# Supplementary material for: Spatial and temporal variations in basal melting at Nivlisen ice shelf, East Antarctica, derived from phase-sensitive radars
Source: Copernicus journal article supplement (doi:10.5194/tc-2019-108), 2019-05-24
Supplement: Supplementary file 1 [file tc-2019-108-supplement.pdf]

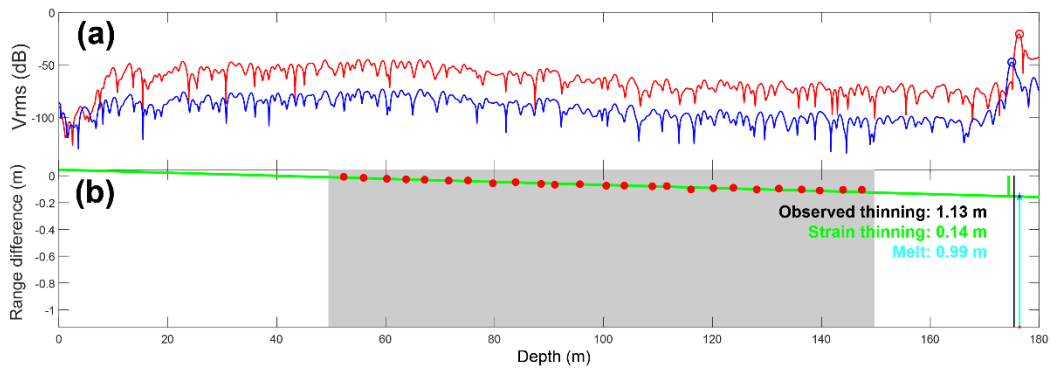

**Figure S1.** Calculation of basal melt from ApRES at the seaward overwintering site (Fig. 1b): **(a)** Fourier transform of mean chirps from first (red) and second (blue) visits after aligning to account for snow accumulation. Basal displacement was calculated by cross-correlating the portion of the returns around the basal maxima (red and blue circles). **(b)** Estimating vertical strain using linear fit (green line) of relative internal layer motion (red dots). Grey box is the depth window for the strain estimation. The given rate for observed thinning is the sum of basal melt rate and strain thinning assuming a uniform strain rate through the thickness column below the firn layer.

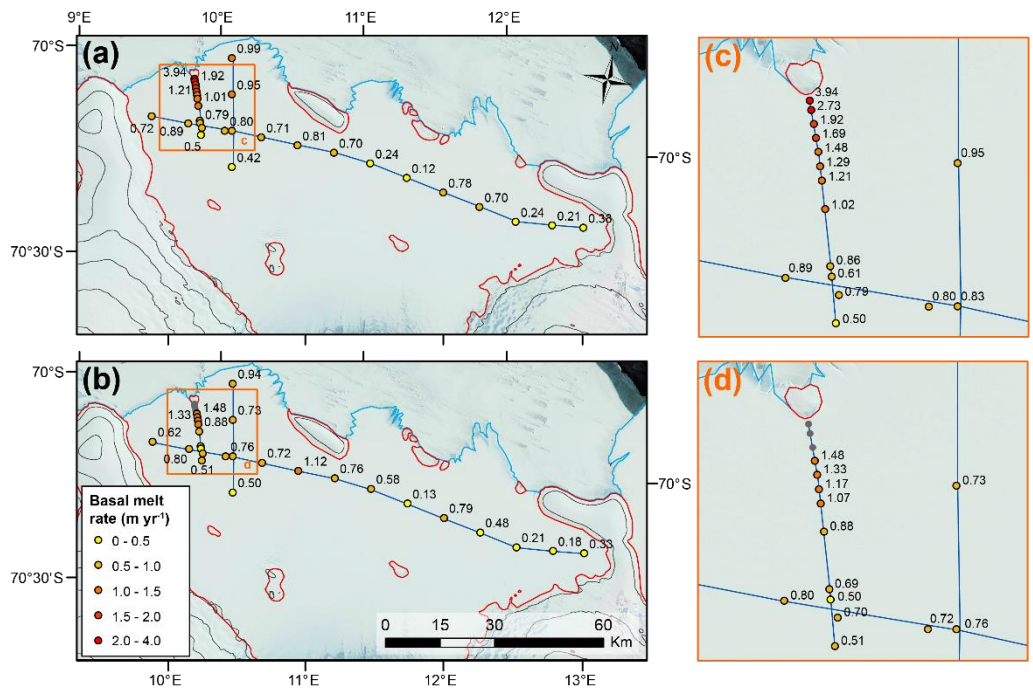

**Figure S2.** Annual averaged basal melt rates derived from ApRES in (a) 2017 and (b) 2018. (c) and (d) shows the melt rates towards an ice rumples. Three locations closest to the rumples were not reoccupied in December 2018. Contour lines and background images are same as in Fig. 1 of the main paper.

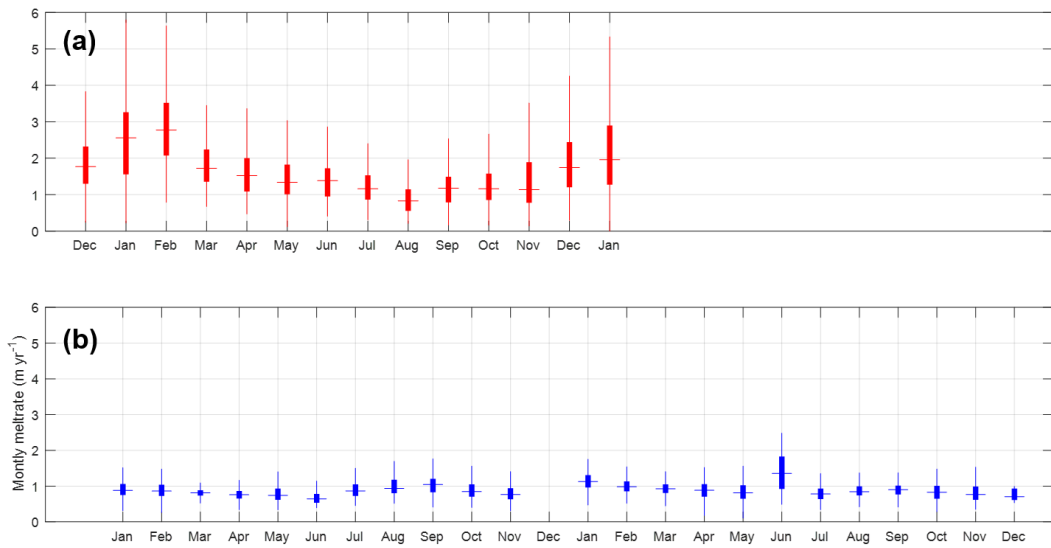

**Figure S3.** Box plots of basal melting for every month from Dec 2016–Dec 2018 at the **(a)** seaward and **(b)** landward site. On each box, the central mark is the median basal melt, the edges of the box are the twenty-fifth and seventy-fifth percentiles, and the whiskers extend to the most extreme basal melt measurements during a month that are not considered to be outliers.

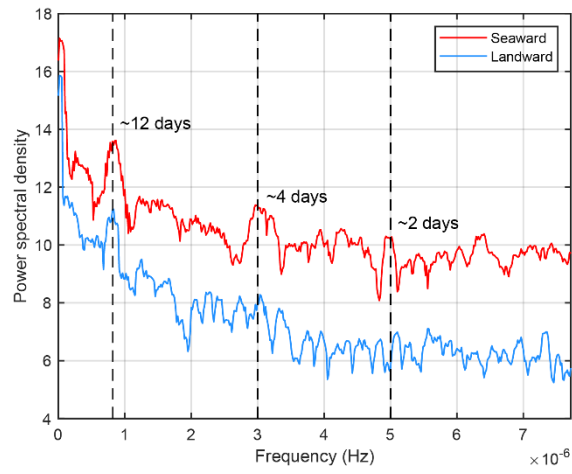

**Figure S4.** Power spectral density estimates of the normalized 36 h filtered seaward and landward basal melt rates.

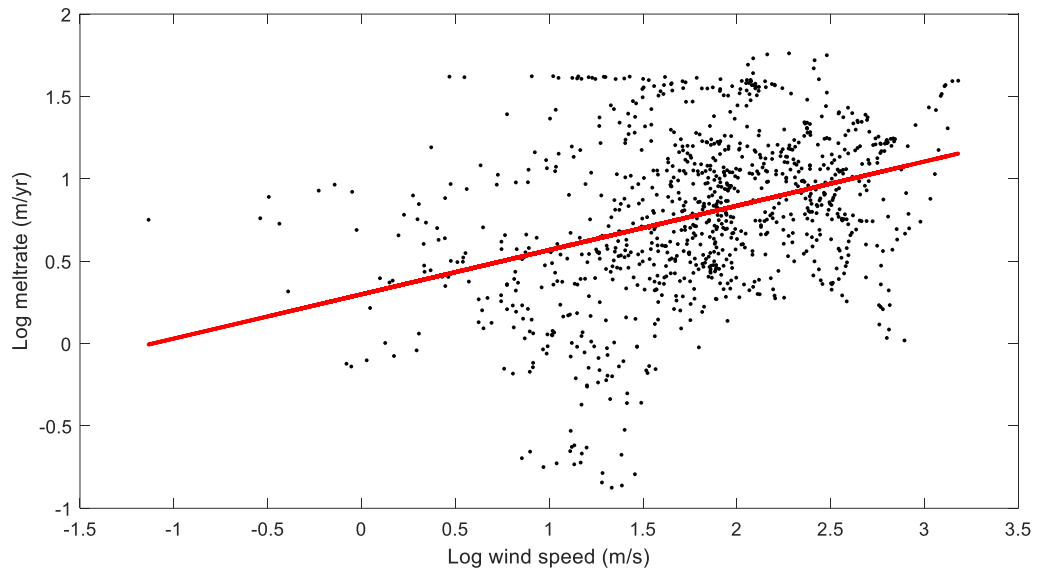

**Figure S5.** Scatter plot with the normalized melt rates at the seaward site and wind speeds from 11 Dec 2016–1 Mar 2017. The red line shows the linear regression.

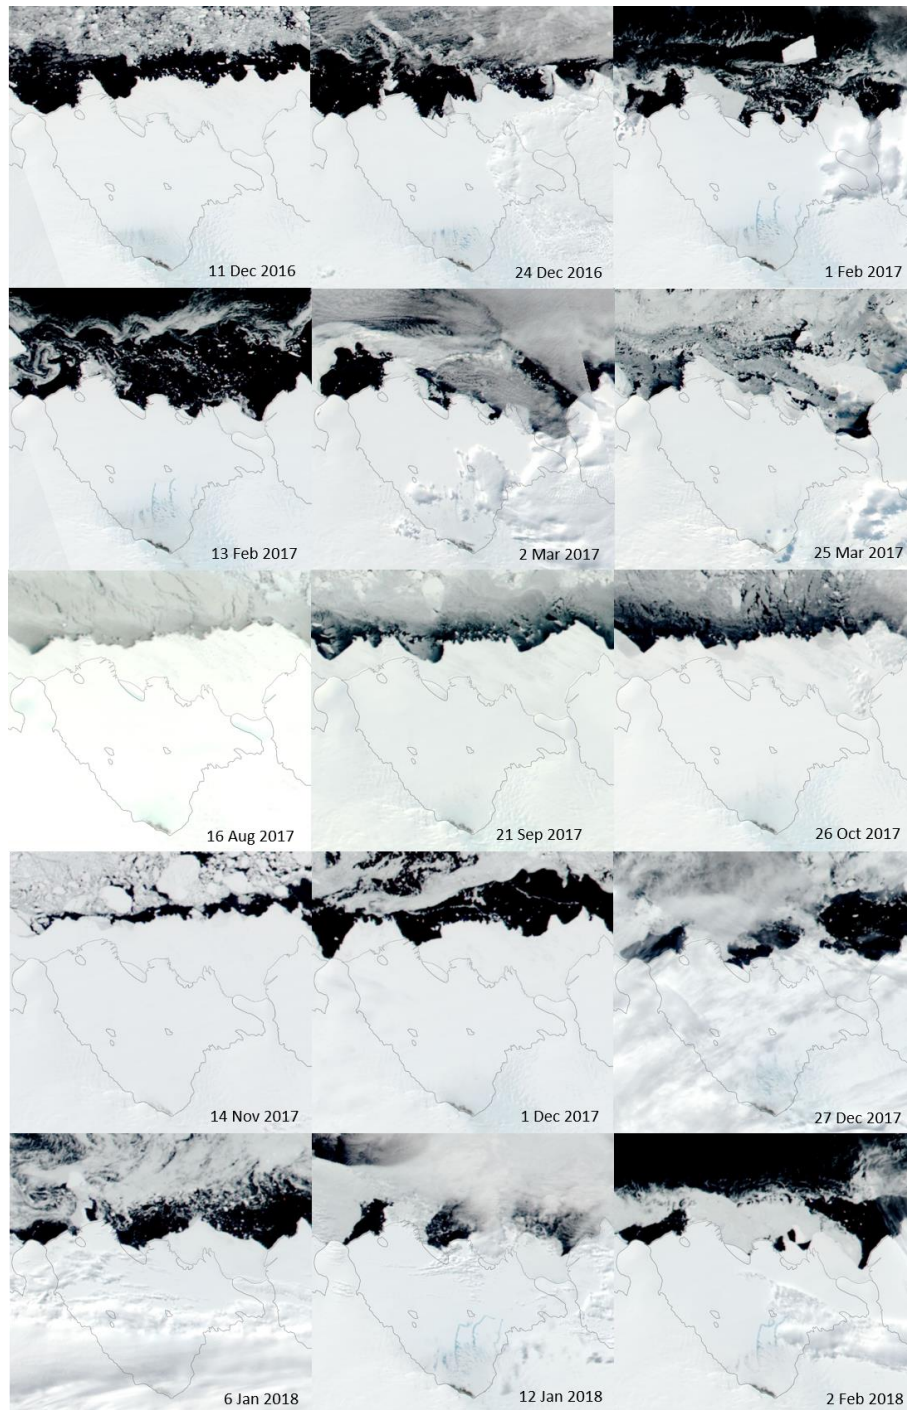

**Figure S6.** MODIS corrected reflectance imagery from NASA Worldview showing the main developments in sea ice cover in front of Nivlisen during the observational period of the seaward ApRES station (11 Dec 2016 – 4 Feb 2018). Sea ice is widespread in front of Nivlisen during winter and then partly breaks up during summer, typically starting from the west and progressing to the more sheltered eastern side. The general pattern of summer retreat is interrupted by irregular periods of sea ice re-growth (e.g. early February 2017 and 2018).
